# Supplementary material
Source: PubMed Central journal article supplement (PMC6454210)
Supplement: NIHMS1016694-supplement-1.pdf [file NIHMS1016694-supplement-1.pdf]

**Supplemental Table I.** Missing data for American Academy of Dermatology questionnaire variables  
(N = 2,046,531)

| AAD questionnaire variable                    | Years in which the variable was collected* | Total missing, n (%) | Missing in years in which the variable was collected, n (%) |
|-----------------------------------------------|--------------------------------------------|----------------------|-------------------------------------------------------------|
| Sex                                           | 1986-2014                                  | 34,718 (1.7)         | 34,718 (1.7)                                                |
| Age                                           | 1986-2014                                  | 183,966 (9.0)        | 183,966 (9.0)                                               |
| Race                                          | 2001-2010 and 2012-2014                    | 1,015,135 (49.6)     | 95,115 (8.4)                                                |
| Education completed                           | 1991-2008                                  | 827,176 (40.4)       | 47,319 (3.7)                                                |
| Health insurance <sup>†</sup>                 | 1992-2010                                  | 751,215 (36.7)       | 60,622 (4.5)                                                |
| Regular dermatologist <sup>‡</sup>            | 1992-2010                                  | 788,907 (38.5)       | 98,314 (7.3)                                                |
| Been to screening before <sup>§</sup>         | 1992-2010                                  | 741,842 (36.2)       | 51,249 (3.8)                                                |
| Without screening, see doctor <sup>  </sup>   | 1992-2014                                  | 512,012 (25.0)       | 204,261 (11.7)                                              |
| Ever had skin checked for cancer <sup>¶</sup> | 2001-2010                                  | 1,234,172 (60.3)     | 32,311 (3.8)                                                |
| Personal history of skin cancer               | 1986-2014                                  | 72,031 (3.5)         | 72,031 (3.5)                                                |
| Family history of skin cancer                 | 1986-2014                                  | 115,038 (5.6)        | 115,038 (5.6)                                               |
| Recent mole change <sup>#</sup>               | 1986-2014                                  | 160,551 (7.9)        | 160,551 (7.9)                                               |

\*No screening forms were available for the years 1985, 1995, 1996, and 2000.

<sup>†</sup>Do you have health insurance?

<sup>‡</sup>Do you have a regular dermatologist?

<sup>§</sup>Have you ever been to a skin cancer screening before?

<sup>||</sup>Without this screening, would you have seen a doctor for your skin?

<sup>¶</sup>Have you ever had your skin checked for cancer by a dermatologist or other doctor?

<sup>#</sup>Do you have any moles that have recently changed in size, color, or shape?

**Supplemental Table II.** American Academy of Dermatology National Skin Cancer Screening Program demographics (N = 1,963,141)

| Variable                                            | Screen year |      |      |      |      |      |      |      |      |      |      |      |
|-----------------------------------------------------|-------------|------|------|------|------|------|------|------|------|------|------|------|
|                                                     | 1986        | 1987 | 1988 | 1989 | 1990 | 1991 | 1992 | 1993 | 1994 | 1997 | 1998 | 1999 |
| Sex                                                 |             |      |      |      |      |      |      |      |      |      |      |      |
| Male                                                | 38.3        | 38.0 | 38.4 | 37.3 | 38.9 | 38.7 | 39.6 | 40.0 | 39.5 | 38.9 | 38.4 | 38.2 |
| Female                                              | 61.7        | 62.0 | 61.7 | 62.7 | 61.1 | 61.3 | 60.4 | 60.0 | 60.5 | 61.1 | 61.6 | 61.8 |
| Age, y*                                             |             |      |      |      |      |      |      |      |      |      |      |      |
| 15-19                                               | 0.9         | 1.2  | 1.1  | 1.0  | 1.2  | 0.9  | 0.9  | 0.9  | 1.1  | 0.9  | 1.0  | 1.0  |
| 20-29                                               | 6.7         | 8.2  | 8.0  | 7.2  | 8.2  | 5.6  | 6.0  | 6.5  | 6.9  | 6.9  | 6.9  | 7.4  |
| 30-39                                               | 12.6        | 15.6 | 15.1 | 15.4 | 16.2 | 14.7 | 14.7 | 14.3 | 15.2 | 14.7 | 14.0 | 14.6 |
| 40-49                                               | 13.2        | 15.0 | 15.2 | 15.6 | 16.2 | 17.3 | 17.3 | 17.3 | 19.3 | 18.7 | 18.7 | 18.6 |
| 50-59                                               | 18.1        | 17.3 | 17.8 | 16.8 | 15.7 | 16.0 | 16.8 | 17.4 | 20.0 | 20.0 | 19.7 | 20.6 |
| 60-69                                               | 28.5        | 25.7 | 26.2 | 25.6 | 24.1 | 21.9 | 22.6 | 23.5 | 24.9 | 22.9 | 22.6 | 21.3 |
| 70-79                                               | 16.8        | 14.2 | 14.3 | 15.2 | 15.3 | 18.6 | 17.7 | 16.6 | 12.3 | 15.7 | 17.1 | 16.4 |
| 80-90                                               | 3.3         | 2.7  | 2.3  | 3.0  | 3.2  | 5.0  | 4.0  | 3.5  | 0.2  | 0.2  | 0.1  | 0.1  |
| Education completed <sup>†</sup>                    |             |      |      |      |      |      |      |      |      |      |      |      |
| Elementary school                                   | —           | —    | —    | —    | —    | 5.0  | 4.3  | 4.8  | 3.7  | 3.0  | 3.0  | 2.8  |
| High school                                         | —           | —    | —    | —    | —    | 38.4 | 43.3 | 44.1 | 41.8 | 40.1 | 39.0 | 39.1 |
| College                                             | —           | —    | —    | —    | —    | 40.0 | 35.3 | 33.7 | 36.6 | 38.0 | 38.8 | 39.0 |
| Graduate or post-graduate school                    | —           | —    | —    | —    | —    | 16.6 | 17.0 | 17.3 | 17.9 | 18.8 | 19.2 | 19.1 |
| Race <sup>†</sup>                                   |             |      |      |      |      |      |      |      |      |      |      |      |
| White                                               | —           | —    | —    | —    | —    | —    | —    | —    | —    | —    | —    | —    |
| Black                                               | —           | —    | —    | —    | —    | —    | —    | —    | —    | —    | —    | —    |
| Hispanic                                            | —           | —    | —    | —    | —    | —    | —    | —    | —    | —    | —    | —    |
| Other                                               | —           | —    | —    | —    | —    | —    | —    | —    | —    | —    | —    | —    |
| Access to care <sup>†</sup>                         |             |      |      |      |      |      |      |      |      |      |      |      |
| Uninsured <sup>‡</sup>                              | —           | —    | —    | —    | —    | —    | 9.6  | 9.5  | 10.5 | 7.7  | 7.5  | 7.3  |
| No regular dermatologist <sup>§</sup>               | —           | —    | —    | —    | —    | —    | 80.4 | 80.1 | 80.3 | 79.6 | 79.8 | 80.1 |
| No prior screening <sup>  </sup>                    | —           | —    | —    | —    | —    | —    | 83.4 | 81.2 | 79.8 | 74.8 | 73.5 | 72.9 |
| Would not have otherwise seen a doctor <sup>¶</sup> | —           | —    | —    | —    | —    | —    | 51.9 | 52.3 | 51.1 | 50.3 | 50.6 | 50.7 |
| Never checked for skin cancer before <sup>#</sup>   | —           | —    | —    | —    | —    | —    | —    | —    | —    | —    | —    | —    |
| Risk factors                                        |             |      |      |      |      |      |      |      |      |      |      |      |
| Personal history of skin cancer                     | 11.3        | 11.4 | 12.4 | 12.9 | 13.5 | 13.7 | 13.5 | 14.0 | 14.0 | 14.0 | 14.4 | 13.4 |
| Family history of skin cancer                       | 18.9        | 21.6 | 25.0 | 25.8 | 26.7 | 27.7 | 28.0 | 28.2 | 28.8 | 30.1 | 30.5 | 30.9 |
| Recent change in mole <sup>**</sup>                 | 0.0         | 0.0  | 40.4 | 41.9 | 40.9 | 30.5 | 29.2 | 28.3 | 28.9 | 29.9 | 30.0 | 29.4 |

\*Persons younger than 15 or older than 90 years of age (1.4% of the screening population) were excluded because of a lack of century of birth (ie, date of birth was collected as MM/DD/YY), making an accurate calculation of age at these extremes tenuous.

<sup>†</sup>Not all variables were collected from 1986 to 2014. There are no screening forms for the years 1995, 1996, or 2000. Refer to Supplemental Table I for dates and missing data.

<sup>‡</sup>Do you have health insurance? (n = 1,299,765).

<sup>§</sup>Do you have a regular dermatologist? (n = 1,299,765).

<sup>||</sup>Have you ever been to a skin cancer screening before? (n = 1,299,765).

<sup>¶</sup>Without this screening, would you have seen a doctor for your skin? (n = 1,660,846).

<sup>#</sup>Have you ever had your skin checked for cancer by a dermatologist or other doctor? (n = 796,354).

<sup>\*\*</sup>Do you have any moles that have recently changed in size, color, or shape?

**Supplemental Table III.** AAD National Skin Cancer Screening Program demographics (N = 1,963,141)

| Variable                                          | Screen year |      |      |      |      |      |      |      |      |      |      |      |      |      |
|---------------------------------------------------|-------------|------|------|------|------|------|------|------|------|------|------|------|------|------|
|                                                   | 2001        | 2002 | 2003 | 2004 | 2005 | 2006 | 2007 | 2008 | 2009 | 2010 | 2011 | 2012 | 2013 | 2014 |
| <b>Sex</b>                                        |             |      |      |      |      |      |      |      |      |      |      |      |      |      |
| Male                                              | 38.3        | 39.4 | 37.9 | 37.6 | 37.9 | 37.3 | 35.8 | 36.2 | 34.2 | 34.9 | 35.8 | 36.6 | 37.4 | 38.0 |
| Female                                            | 61.7        | 60.6 | 62.1 | 62.4 | 62.2 | 62.7 | 64.2 | 63.8 | 65.9 | 65.1 | 64.2 | 63.4 | 62.6 | 62.0 |
| <b>Age, y*</b>                                    |             |      |      |      |      |      |      |      |      |      |      |      |      |      |
| 15-19                                             | 1.3         | 1.2  | 1.2  | 1.1  | 1.0  | 1.3  | 1.1  | 1.1  | 1.3  | 1.2  | 1.2  | 1.2  | 1.1  | 1.0  |
| 20-29                                             | 8.2         | 8.7  | 7.3  | 7.3  | 7.1  | 8.5  | 8.4  | 8.6  | 8.6  | 8.4  | 8.5  | 9.4  | 9.4  | 9.3  |
| 30-39                                             | 15.4        | 14.9 | 13.4 | 12.0 | 11.4 | 12.9 | 11.8 | 12.1 | 12.0 | 12.0 | 11.7 | 12.2 | 12.7 | 13.1 |
| 40-49                                             | 21.6        | 20.9 | 20.7 | 18.2 | 17.8 | 19.6 | 17.3 | 17.2 | 16.9 | 17.3 | 16.9 | 16.3 | 15.8 | 15.7 |
| 50-59                                             | 25.6        | 25.2 | 25.8 | 22.7 | 23.7 | 25.6 | 23.0 | 23.5 | 23.9 | 24.6 | 24.7 | 24.0 | 24.0 | 23.3 |
| 60-69                                             | 23.5        | 23.4 | 24.2 | 21.2 | 21.6 | 22.4 | 21.3 | 21.2 | 21.7 | 21.5 | 22.0 | 21.8 | 21.8 | 22.1 |
| 70-79                                             | 4.1         | 5.5  | 7.2  | 13.3 | 13.2 | 9.5  | 13.0 | 12.2 | 11.7 | 11.3 | 11.3 | 11.2 | 11.3 | 11.6 |
| 80-90                                             | 0.4         | 0.3  | 0.3  | 4.2  | 4.2  | 0.2  | 4.3  | 4.2  | 3.9  | 3.8  | 3.7  | 3.9  | 3.8  | 3.8  |
| <b>Education completed<sup>†</sup></b>            |             |      |      |      |      |      |      |      |      |      |      |      |      |      |
| Elementary school                                 | 2.3         | 2.1  | 2.4  | 2.1  | 2.0  | 1.8  | 1.7  | 1.5  | —    | —    | —    | —    | —    | —    |
| High school                                       | 37.7        | 37.1 | 37.3 | 36.7 | 36.0 | 34.9 | 34.1 | 33.4 | —    | —    | —    | —    | —    | —    |
| College                                           | 39.3        | 40.8 | 39.9 | 40.8 | 41.0 | 42.3 | 42.3 | 43.1 | —    | —    | —    | —    | —    | —    |
| Graduate or post-graduate school                  | 20.8        | 20.1 | 20.4 | 20.5 | 20.9 | 21.1 | 21.9 | 22.0 | —    | —    | —    | —    | —    | —    |
| <b>Race<sup>†</sup></b>                           |             |      |      |      |      |      |      |      |      |      |      |      |      |      |
| White                                             | 92.9        | 92.6 | 93.0 | 92.2 | 91.2 | 90.5 | 90.3 | 89.8 | 90.3 | 89.5 | —    | 88.4 | 87.5 | 87.4 |
| Black                                             | 1.8         | 1.7  | 1.6  | 1.9  | 2.0  | 2.3  | 2.6  | 2.6  | 2.4  | 2.5  | —    | 2.7  | 3.1  | 3.0  |
| Hispanic                                          | 2.6         | 2.9  | 2.6  | 3.1  | 3.6  | 3.9  | 3.9  | 4.2  | 3.9  | 4.3  | —    | 4.7  | 4.9  | 4.7  |
| Other                                             | 2.7         | 2.8  | 2.8  | 2.8  | 3.2  | 3.3  | 3.2  | 3.4  | 3.5  | 3.8  | —    | 4.3  | 4.5  | 4.9  |
| <b>Access to care<sup>†</sup></b>                 |             |      |      |      |      |      |      |      |      |      |      |      |      |      |
| Uninsured <sup>‡</sup>                            | 7.4         | 8.4  | 8.3  | 9.1  | 8.9  | 9.6  | 9.6  | 9.5  | 11.2 | 11.4 | —    | —    | —    | —    |
| No regular dermatologist <sup>§</sup>             | 80.0        | 80.0 | 78.8 | 78.7 | 79.0 | 79.3 | 79.0 | 78.9 | 77.7 | 78.2 | —    | —    | —    | —    |
| No prior screening <sup>  </sup>                  | 71.5        | 70.3 | 68.0 | 67.2 | 66.5 | 68.1 | 71.8 | 71.4 | 70.3 | 69.2 | —    | —    | —    | —    |
| Wouldn't have otherwise seen doctor <sup>¶</sup>  | 50.9        | 51.1 | 51.1 | 52.0 | 51.7 | 51.6 | 51.7 | 51.6 | 51.9 | 52.8 | 47.6 | 52.6 | 52.7 | 52.2 |
| Never checked for skin cancer before <sup>#</sup> | 49.0        | 48.4 | 46.2 | 45.9 | 45.7 | 47.0 | 46.4 | 46.4 | 46.2 | 46.0 | —    | —    | —    | —    |
| <b>Risk factors</b>                               |             |      |      |      |      |      |      |      |      |      |      |      |      |      |
| Personal history of skin cancer                   | 13.8        | 13.7 | 14.9 | 14.1 | 14.0 | 13.1 | 13.2 | 13.1 | 13.0 | 12.1 | 13.1 | 13.2 | 13.1 | 13.3 |
| Family history of skin cancer                     | 34.7        | 34.7 | 35.9 | 36.3 | 36.2 | 36.2 | 36.1 | 36.3 | 39.3 | 39.1 | 40.0 | 39.9 | 40.1 | 40.3 |
| Recent change in mole <sup>**</sup>               | 32.5        | 32.0 | 31.6 | 31.2 | 31.2 | 30.9 | 30.3 | 30.0 | 30.9 | 30.3 | 32.1 | 30.5 | 30.6 | 29.2 |

\*Persons younger than 15 years or older than 90 years (1.4% of screening population) were excluded because of a lack of century of birth (ie, date of birth was collected as MM/DD/YY), making an accurate calculation of age at these extremes tenuous.

<sup>†</sup>Not all variables were collected from 1986 to 2014. There are no screening forms for the years 1995, 1996, or 2000. Refer to [Supplemental Table I](#) for dates and missing data.

<sup>‡</sup>Do you have health insurance? (n = 1,299,765).

<sup>§</sup>Do you have a regular dermatologist? (n = 1,299,765).

<sup>||</sup>Have you ever been to a skin cancer screening before? (n = 1,299,765).

<sup>¶</sup>Without this screening, would you have seen a doctor for your skin? (n = 1,660,846).

<sup>#</sup>Have you ever had your skin checked for cancer by a dermatologist or other doctor? (n = 796,354).

<sup>\*\*</sup>Do you have any moles that have recently changed in size, color, or shape?
